# Supplementary material for: Improving the Nutrient Quality of Foods and Beverages Using Product Specific Standards for Nutrients to Limit Will Substantially Reduce Mean Population Intakes of Energy, Sodium, Saturated Fat and Sugars towards WHO Guidelines
Source: MDPI journal article supplement (doi:10.3390/nu14204289), 2022-10-14
Supplement: s1 [file s1]

## Supplementary material

**Supplementary Table S1:** Assumed allocation of energy intake over the day for men (2500 kcal/day), women (2000 kcal/day) and children aged 6-12 years (averaged to 1855kcal/day)

|                                                      | <b>Recommended</b> | <b>Men</b> | <b>Women</b> | <b>Children 6-12 years</b> |
|------------------------------------------------------|--------------------|------------|--------------|----------------------------|
| Beverages                                            | 10%                | 250 kcal   | 200 kcal     | 185 kcal                   |
| The remaining 90% of calories distributed as follows |                    |            |              |                            |
| Breakfast                                            | 20%                | 450 kcal   | 360 kcal     | 330 kcal                   |
| Lunch                                                | 30%                | 675 kcal   | 540 kcal     | 500 kcal                   |
| Dinner                                               | 30%                | 675 kcal   | 540 kcal     | 500 kcal                   |
| Snacks                                               | 20%                | 450 kcal   | 360 kcal     | 330 kcal                   |

**Supplementary Table S2** Unilever standards for nutrients to limit

| Product group                         | As sold/as prepared  | Energy           | Sodium         | SAFA        | <u>Added</u> Sugars |
|---------------------------------------|----------------------|------------------|----------------|-------------|---------------------|
| Main Meals                            | As prepared          | 600 kcal/serving | 250 mg/100g    | 1.5 g/100g  | 1.25 g/100g         |
| Small Meals                           | As prepared          | 400 kcal/serving | 250 mg/100g    | 1.5 g/100g  | 1.25 g/100g         |
| Cereals                               | As sold              | NA               | 375 mg/100g    | 2 g/100g    | 20g/100g            |
| Bread Products                        | As sold              | NA               | 375 mg/100g    | 1 g/100g    | 4g/100g             |
| Spreads - Sweet & Savoury             | As sold              | NA               | 720 mg/100g    | 10 g/100g   | 17g/100g            |
| Carbohydrate-based Dishes             | As prepared          | 300 kcal/serving | 250 mg/100g    | 1.5 g/100g  | 1 g/100g            |
| Animal Protein                        | As sold              | 300 kcal/serving | 675 mg/100g    | 5 g/100g    | 1 g/100g            |
| Plant Protein                         | As sold/as prepared* | 300 kcal/serving | 450 mg/100g    | 3 g/100g    | 2.5 g/100g          |
| Soups                                 | As prepared          | NA               | 265 mg/100g    | 1.5 g/100g  | 1 g/100g            |
| Meal Sauces                           | As sold/as prepared* | NA               | 340 mg/100g    | 2 g/100g    | 2.5 g/100g          |
| Pickled & Fermented Vegetables        | As sold              | NA               | 1000 mg/100g   | NA          | 8 g/100g            |
| Water-based Sauces                    | As sold/as prepared* | NA               | 750 mg/100g    | NA          | 17 g/100g           |
| Emulsion-based Sauces & Cooking Fats  | As sold/as prepared* | NA               | 750 mg/100g    | 18% of fat  | 7 g/100g            |
| Mustards                              | As sold              | NA               | 2000 mg/100g   | 18% of fat  | 7 g/100g            |
| Dish Specific Bouillons & Seasonings  | As prepared          | NA               | 265 mg/100g    | NA          | 1 g/100g            |
| Liquid & Paste Bouillons & Seasonings | As sold              | NA               | 4000 mg/100g   | NA          | 40 g/100g           |
| Universal Bouillons & Seasonings      | As sold              | NA               | 24,000 mg/100g | NA          | 20 g/100g           |
| Toppings - Sweet & Savoury            | As sold              | NA               | 1250 mg/100g   | 12.5 g/100g | 17 g/100g           |
| Cooking & Baking Agents               | As sold              | NA               | 1250 mg/100g   | 12.5 g/100g | 31 g/100g           |
| Product group                         | As sold/as prepared  | Energy           | Sodium         | SAFA        | <u>Total</u> Sugars |
| Ice-cream & Desserts                  | As sold/as prepared* | 150 kcal/serving | NA             | 5 g/serving | 12 g/serving        |
| Snacks - Sweet & Savoury              | As sold/as prepared* | 150 kcal/serving | 300 mg/serving | 3 g/serving | 12 g/serving        |
| Kids Ice-cream & Desserts             | As sold/as prepared* | 110 kcal/serving | NA             | 3 g/serving | 12 g/serving        |
| Kids Snacks - Sweet & Savoury         | As sold/as prepared* | 110 kcal/serving | 300 mg/serving | 3 g/serving | 12 g/serving        |
| RTD & Concentrated Beverages          | As sold/as prepared* | NA               | NA             | 1 g/100g    | 5 g/100g            |
| Leaf Teas & Herbal Infusions          | As prepared          | NA               | NA             | NA          | No added sugar      |
| Fruit Juices                          | As sold/as prepared* | NA               | NA             | NA          | No added sugar      |
| Cereal & Malt-based Beverages         | As prepared          | NA               | NA             | 1g/100g     | 6 g/100g**          |
| All Other Products                    | As sold/as prepared* | NA               | 100 mg/100g    | 1 g/100g    | 2.5 g/100g          |

\*Depending on the product format

\*\*Excluding sugars from preparation medium (if milk or milk alternative)

**Supplementary Table S3:** Standards used for products groups not present in the Unilever portfolio

| Product group                       | As sold/as prepared | Energy | Sodium      | SAFA             | <u>Added</u> Sugars |
|-------------------------------------|---------------------|--------|-------------|------------------|---------------------|
| Cheese (products)                   | As sold             | NA     | 675 mg/100g | 15 g/100g        | NA                  |
| Fat spreads<br>(margarine/butter)   | As sold             | NA     | 470 mg/100g | 33% of total fat | NA                  |
| Dairy (excluding cheese)            | As sold             | NA     | NA          | NA               | NA                  |
| Vegetables (fresh and<br>processed) | As sold             | NA     | NA          | NA               | NA                  |
| Fruit (fresh and<br>processed)      | As sold             | NA     | NA          | NA               | NA                  |
| Supplements                         | NA                  | NA     | NA          | NA               | NA                  |
| Alcohol                             | NA                  | NA     | NA          | NA               | NA                  |
| Water                               | NA                  | NA     | NA          | NA               | NA                  |
| Baby/Toddler foods                  | NA                  | NA     | NA          | NA               | NA                  |

**Supplementary Table S4:** Top contributors to changes in energy intake

|                                                 | Absolute change from baseline in<br>energy intake (kcal) by survey |             |             |             |             |
|-------------------------------------------------|--------------------------------------------------------------------|-------------|-------------|-------------|-------------|
|                                                 | UK                                                                 | Brazil      | France      | China       | US          |
| Main meals                                      | -14                                                                | -13         | -17         |             | -40         |
| Small meals                                     | -24                                                                | -59         | -47         | -11         | -122        |
| Carbohydrate-based Dishes                       | -7                                                                 | -9          | -9          | -314        | -12         |
| Animal Protein                                  |                                                                    | -5          |             | -45         | -8          |
| Plant Protein                                   |                                                                    |             |             | -6          |             |
| Ice-cream & Desserts                            | -5                                                                 |             | -7          |             |             |
| Snacks - Sweet & Savoury                        | -22                                                                | -17         | -76         | -2          | -56         |
| <b>Sum of top 5 contributing product groups</b> | <b>-72</b>                                                         | <b>-103</b> | <b>-156</b> | <b>-378</b> | <b>-238</b> |
| <b>Change from all Product Groups</b>           | <b>-81</b>                                                         | <b>-105</b> | <b>-162</b> | <b>-378</b> | <b>-242</b> |
| <b>% contribution from top 5 contributors</b>   | <b>89%</b>                                                         | <b>98%</b>  | <b>96%</b>  | <b>100%</b> | <b>98%</b>  |

**Supplementary Table S5:** Top contributors to changes in sodium intake

|                                                 | Absolute change from baseline in<br>sodium change (mg) by survey |             |             |             |             |
|-------------------------------------------------|------------------------------------------------------------------|-------------|-------------|-------------|-------------|
|                                                 | UK                                                               | Brazil      | France      | China       | US          |
| Main meals                                      | -20                                                              | -40         | -75         |             | -139        |
| Small meals                                     | -31                                                              | -195        | -122        | -19         | -261        |
| Bread Products                                  | -29                                                              | -167        | -313        | -17         | -69         |
| Carbohydrate-based Dishes                       |                                                                  | -28         |             | -14         | -40         |
| Animal Protein                                  | -72                                                              | -85         | -77         | -55         | -111        |
| Soups                                           |                                                                  |             | -30         |             |             |
| Pickled & Fermented Vegetables                  |                                                                  |             |             | -93         |             |
| Cheese (products)                               | -10                                                              |             |             |             |             |
| <b>Sum of top 5 contributing product groups</b> | <b>-162</b>                                                      | <b>-515</b> | <b>-617</b> | <b>-198</b> | <b>-620</b> |
| <b>Change from all Product Groups</b>           | <b>-242</b>                                                      | <b>-559</b> | <b>-685</b> | <b>-208</b> | <b>-744</b> |
| <b>% contribution from top 5 contributors</b>   | <b>67%</b>                                                       | <b>92%</b>  | <b>90%</b>  | <b>95%</b>  | <b>83%</b>  |

**Supplementary Table S6: Top contributors to changes in SAFA intake**

|                                                 | Absolute change from baseline in saturated fat change (g) by survey |             |             |             |
|-------------------------------------------------|---------------------------------------------------------------------|-------------|-------------|-------------|
|                                                 | UK                                                                  | Brazil      | France      | US          |
| Main meals                                      | -0.3                                                                | -0.6        |             | -1.4        |
| Small meals                                     | -0.9                                                                | -1.3        | -1.8        | -3.4        |
| Bread Products                                  |                                                                     | -0.2        |             |             |
| Carbohydrate-based Dishes                       |                                                                     |             |             | -0.6        |
| Animal Protein                                  | -0.5                                                                | -0.8        | -1.3        | -0.7        |
| Snacks - Sweet & Savoury                        |                                                                     | -0.1        | -1.1        | -0.8        |
| Cheese (products)                               | -0.7                                                                |             | -0.8        |             |
| Fat spreads (margarine/butter)                  | -1.1                                                                |             | -1.4        |             |
| <b>Sum of top 5 contributing product groups</b> | <b>-3.5</b>                                                         | <b>-3</b>   | <b>-6.4</b> | <b>-6.9</b> |
| <b>Change from all Product Groups</b>           | <b>-5</b>                                                           | <b>-3.1</b> | <b>-9.8</b> | <b>-8.3</b> |
| <b>% contribution from top 5 contributors</b>   | <b>70%</b>                                                          | <b>97%</b>  | <b>65%</b>  | <b>83%</b>  |

**Supplementary Table S7: Top contributors to changes in added sugar intake**

|                                                 | Absolute change from baseline in added sugars change (g) by survey |              |             |
|-------------------------------------------------|--------------------------------------------------------------------|--------------|-------------|
|                                                 | UK                                                                 | US           | Brazil      |
| Small meals                                     |                                                                    | -1.2         |             |
| Cereals & porridges                             | -0.8                                                               | -0.8         |             |
| Bread Products                                  |                                                                    |              |             |
| Spreads - Sweet & Savoury                       | -1.5                                                               |              |             |
| Animal Protein                                  |                                                                    | -0.9         |             |
| Toppings - Sweet & Savoury                      |                                                                    | -0.8         |             |
| Snacks - Sweet & Savoury                        | -2                                                                 | -3.4         | -0.3        |
| RTD & Concentrated Beverages                    | -3                                                                 | -10.9        |             |
| Leaf Teas & Herbal Infusions                    |                                                                    |              |             |
| Fruit and Vegetable Juices                      | -3.6                                                               |              | -1.4        |
| <b>Sum of top 5 contributing product groups</b> | <b>-10.9</b>                                                       | <b>-18</b>   | <b>-1.7</b> |
| <b>Change from all Product Groups</b>           | <b>-13.4</b>                                                       | <b>-21.2</b> | <b>-1.8</b> |
| <b>% contribution from top 5 contributors</b>   | <b>81%</b>                                                         | <b>85%</b>   | <b>94%</b>  |

**Supplementary Table S8: Top contributors to changes in total sugar intake**

|                                                 | Absolute change from baseline in total sugars change (g) by survey |              |              |
|-------------------------------------------------|--------------------------------------------------------------------|--------------|--------------|
|                                                 | UK                                                                 | US           | France       |
| Small meals                                     |                                                                    | -1.2         |              |
| Cereals & porridges                             | -1.2                                                               |              |              |
| Spreads - Sweet & Savoury                       | -1.4                                                               |              | -5.2         |
| Animal Protein                                  |                                                                    | -0.9         |              |
| Toppings - Sweet & Savoury                      |                                                                    | -0.9         |              |
| Ice-cream & Desserts                            |                                                                    | -0.9         | -1.6         |
| Snacks - Sweet & Savoury                        | -2.7                                                               | -4.1         | -4.6         |
| RTD & Concentrated Beverages                    | -3.1                                                               | -11.2        | -3.8         |
| Fruit and Vegetable Juices                      | -3.6                                                               |              | -6.9         |
| <b>Sum of top 5 contributing product groups</b> | <b>-12</b>                                                         | <b>-19.2</b> | <b>-22.1</b> |
| <b>Change from all Product Groups</b>           | <b>-15.5</b>                                                       | <b>-22.8</b> | <b>-25.6</b> |
| <b>% contribution from top 5 contributors</b>   | <b>77%</b>                                                         | <b>84%</b>   | <b>86%</b>   |
